# Supplementary material for: Cultivation-Independent and Cultivation-Dependent Analysis of Microbes in the Shallow-Sea Hydrothermal System Off Kueishantao Island, Taiwan: Unmasking Heterotrophic Bacterial Diversity and Functional Capacity
Source: Front Microbiol. 2018 Feb 22;9:279. doi: 10.3389/fmicb.2018.00279 (PMC5829616; doi:10.3389/fmicb.2018.00279)
Supplement: Supplementary file 7 [file Table_7.XLS]

## Sheet: Sheet1
Table S7. Key genes identified in strain P5
Catergories	Gene ID	Start	End	Gene name
Sulfur metabolism	Sox multienzyme system
	2630979526	3410312	3410797	sulfur-oxidizing protein SoxX
	2630979527	3410837	3411256	thiosulfate-binding protein SoxY
	2630979528	3411279	3411608	sulfur compound chelating protein SoxZ
	2630979529	3411640	3412500	diheme cytochrome SoxA (sulfur oxidation)
	2630979530	3412610	3414301	sulfate thiol esterase SoxB
	2630979531	3414322	3415623	sulfur dehydrogenase subunit SoxC
	2630979532	3415607	3416641	sulfur dehydrogenase subunit SoxD
	Other sulfur oxidation enzymes
	2630976577	366450	367730	sulfide:quinone oxidoreductase
	2630979273	3141518	3142423	sulfoxide reductase catalytic subunit YedY
	2630979274	3142423	3143040	sulfoxide reductase heme-binding subunit YedZ
	2630979351	3233866	3235185	sulfide:quinone oxidoreductase
	2630979942	3842564	3844765	sulfite reductase (NADPH)
	2630980012	3923880	3924242	Rhodanese-related sulfurtransferase
	2630980013	3924355	3924732	Rhodanese-related sulfurtransferase
	2630977968	1759346	1759726	Rhodanese-related sulfurtransferase
	2630977131	907322	908281	thiosulfate/3-mercaptopyruvate sulfurtransferase
	2630979448	3328000	3328863	thiosulfate/3-mercaptopyruvate sulfurtransferase
	2630976686	483719	484456	adenosine 5-phosphosulfate reductase
	2630978224	2023178	2024890	sulfate adenylyltransferase
	Heterodisulfide reductase
	2630977381	1168235	1169170	heterodisulfide reductase subunit B
	2630977382	1169172	1169927	heterodisulfide reductase subunit C
	2630977383	1169928	1170794	hypothetical protein
	2630977384	1170794	1171846	heterodisulfide reductase subunit A
	2630977385	1171843	1173213	heterodisulfide reductase subunit B
	2630977386	1173254	1174006	heterodisulfide reductase subunit C
Calvin-Benson-Bassham cycle	2630979594	3484624	3485319	ribulose-5-phosphate 3-epimerase
	2630979595	3485403	3486794	ribulose 1,5-bisphosphate carboxylase large subunit
	2630979596	3486892	3487956	fructose-bisphosphate aldolase
	2630979597	3487969	3489177	phosphoglycerate kinase
	2630979598	3489177	3490178	glyceraldehyde-3-phosphate dehydrogenase (NAD+)
	2630979599	3490192	3492183	transketolase
	2630979600	3492197	3493069	phosphoribulokinase
	2630979601	3493091	3494098	D-fructose 1,6-bisphosphatase
	2630979602	3494203	3495123	DNA-binding transcriptional regulator, LysR family
	2630978137	1944134	1945555	ribulose 1,5-bisphosphate carboxylase large subunit
	2630978138	1945589	1945942	ribulose 1,5-bisphosphate carboxylase small subunit
Oxidation	Oxidation of hydrogen by Ni/Fe hydrogenases
	2630978624	2444134	2445126	ferredoxin hydrogenase small subunit
	2630978625	2445123	2446550	hydrogenase large subunit
	2630978626	2446547	2448790	Hydrogenase maturation protein, carbamoyltransferase HypF
	2630978627	2449008	2450093	hydrogenase small subunit
	2630978628	2450097	2451887	hydrogenase large subunit
	2630978629	2451902	2452483	urease accessory protein
	2630978630	2452494	2453279	Ni/Fe-hydrogenase 1 B-type cytochrome subunit
	2630978631	2453561	2454181	Hydrogenase 1 maturation peptidase HyaD. Aspartic peptidase. MEROPS family A31
	2630978632	2454181	2454501	hydrogenase expression/formation protein HypC
	2630978633	2454506	2454883	hydrogenase-1 operon protein HyaE
	2630978634	2454894	2455718	hydrogenase-1 operon protein HyaF
	2630978635	2455715	2456542	[NiFe] hydrogenase assembly chaperone, HybE family
	2630978636	2456539	2457429	hypothetical protein
	2630978637	2457422	2457763	Hydrogenase-3 nickel incorporation protein HypA
	2630978638	2457763	2458647	Hydrogenase nickel incorporation protein HypB
	2630978639	2458647	2460122	DNA-binding transcriptional response regulator, NtrC family
	2630978640	2460126	2460416	Hydrogenase maturation protein HypC
	2630978641	2460413	2461555	Hydrogenase maturation protein HypD
	2630978642	2461552	2462595	Hydrogenase maturation protein, carbamoyl dehydratase HypE
	carbon-monoxide dehydrogenase
	2630977930	1724386	1725174	carbon-monoxide dehydrogenase medium subunit
	2630977931	1725187	1727553	xanthine dehydrogenase, molybdenum binding subunit apoprotein
	2630977932	1727642	1728142	carbon-monoxide dehydrogenase small subunit
	2630978712	2535726	2536514	carbon-monoxide dehydrogenase medium subunit
	2630978713	2536529	2538895	carbon-monoxide dehydrogenase large subunit
	2630978714	2538984	2539484	carbon-monoxide dehydrogenase small subunit
	formate dehydrogenase
	2630979605	3496243	3496464	formate dehydrogenase delta subunit
	2630979606	3496454	3497275	FdhD protein
	2630979607	3497272	3500142	formate dehydrogenase alpha subunit
	2630979608	3500222	3501736	formate dehydrogenase beta subunit
	2630979609	3501733	3502200	formate dehydrogenase gamma subunit
	2630979813	3731778	3732986	formate dehydrogenase gamma subunit
	2630979814	3733073	3733666	formate dehydrogenase beta subunit
	2630979815	3733681	3736578	formate dehydrogenase alpha subunit
	2630979816	3736633	3736899	formate dehydrogenase region TAT target
Photosynthesis gene clusters	2630978051	1856964	1858055	photosynthetic reaction center cytochrome c subunit
	2630978052	1858059	1859027	photosynthetic reaction center M subunit
	2630978053	1859030	1859890	photosynthetic reaction center L subunit
	2630978054	1860035	1860193	light-harvesting complex 1 alpha chain
	2630978055	1860208	1860354	light-harvesting complex 1 beta chain
	2630978056	1860481	1860702	PufQ cytochrome subunit
	2630978057	1860699	1862180	chlorophyllide a reductase subunit Z
	2630978058	1862180	1863760	chlorophyllide a reductase subunit Y
	2630978059	1863893	1864894	chlorophyllide a reductase subunit X
	2630978060	1864884	1865831	3-hydroxyethyl bacteriochlorophyllide a dehydrogenase
	2630978061	1865952	1867100	demethylspheroidene O-methyltransferase
	2630978062	1867100	1867969	farnesyl-diphosphate synthase
	2630978063	1868099	1869589	1-hydroxycarotenoid 3,4-desaturase
	2630978064	1869715	1870506	hydroxyneurosporene synthase
	2630978065	1870864	1871346	TspO and MBR related proteins
	2630978066	1871374	1872429	phytoene synthase
	2630978067	1872434	1874008	phytoene desaturase
	2630978068	1874137	1874913	spheroidene monooxygenase
	2630978069	1874910	1875923	protoporphyrin IX magnesium-chelatase
	2630978070	1875910	1877070	hypothetical protein
	2630978071	1877103	1877615	von Willebrand factor type A domain-containing protein
	2630978072	1877625	1878488	magnesium chelatase accessory protein
	2630978073	1878548	1878985	cytochrome c
	2630978074	1879158	1879976	putative photosynthetic complex assembly protein 2
	2630978075	1879973	1881088	Mg-protoporphyrin IX monomethyl ester (oxidative) cyclase
	2630978076	1881085	1881381	hypothetical protein
	2630978077	1881433	1881900	putative photosynthetic complex assembly protein
	2630978078	1881904	1882536	PH domain-containing protein
	2630978079	1882554	1883342	photosynthetic reaction center H subunit
	2630978080	1883360	1884799	MFS transporter, BCD family, chlorophyll transporter
	2630978081	1884966	1885607	hypothetical protein
	2630978082	1885481	1886377	ferredoxin protochlorophyllide reductase subunit L
	2630978083	1886399	1889974	cobaltochelatase CobN subunit
	2630978084	1889964	1891505	ferredoxin protochlorophyllide reductase subunit B
	2630978085	1891502	1892791	ferredoxin protochlorophyllide reductase subunit N
	2630978086	1892788	1893291	3-vinyl bacteriochlorophyllide hydratase
	2630978087	1893588	1894370	Methanogenic corrinoid protein MtbC1
	2630978088	1894420	1895844	transcriptional regulator PpsR
	2630978089	1895900	1896802	chlorophyll synthase
	2630978090	1896804	1898093	MFS transporter, BCD family, chlorophyll transporter
	2630978091	1898100	1899281	geranylgeranyl reductase
	2630978092	1899278	1899808	isopentenyl-diphosphate delta-isomerase
Motility and chemotaxis	Flagelly assembly
	2630978338	2132848	2133528	flagellar basal-body rod modification protein FlgD
	2630978339	2133542	2135365	Flagellar hook-length control protein FliK
	2630978340	2135482	2135775	Rod binding protein
	2630978341	2135762	2136106	hypothetical protein
	2630978342	2136318	2137511	flagellin
	2630978343	2137589	2137969	flagellar protein FlaF
	2630978344	2137966	2138376	flagellar protein FlbT
	2630978345	2138373	2139164	Protein of unknown function (DUF1217)
	2630978346	2139170	2139961	ATPase, FliI/YscN family
	2630978347	2139952	2140521	ATP synthase alpha/beta family, beta-barrel domain
	2630978348	2140605	2140997	flagellar basal-body rod protein FlgB
	2630978349	2141014	2141406	flagellar basal-body rod protein FlgC
	2630978350	2141418	2141708	flagellar hook-basal body complex protein FliE
	2630978351	2141713	2141979	flagellar biosynthetic protein FliQ
	2630978352	2141983	2142705	flagellar basal-body rod protein FlgF
	2630978353	2142722	2143507	flagellar basal-body rod protein FlgG
	2630978354	2143507	2143938	flagella basal body P-ring formation protein FlgA
	2630978355	2143954	2144691	flagellar L-ring protein precursor FlgH
	2630978356	2144701	2145243	Flagellar basal body-associated protein FliL
	2630978357	2145256	2145603	hypothetical protein
	2630978358	2145600	2146691	flagellar biosynthetic protein FlhB
	2630978359	2146691	2147458	flagellar biosynthetic protein FliR
	2630978360	2147455	2149545	flagellar biosynthesis protein FlhA
	2630978361	2149754	2152141	hypothetical protein
	2630978362	2152138	2153007	chemotaxis protein MotA
	2630978363	2153074	2153700	hypothetical protein
	2630978364	2153697	2154242	hypothetical protein
	2630978365	2154253	2154783	flagellar FliL protein
	2630978366	2154906	2156552	flagellar M-ring protein FliF
	2630978367	2156552	2157148	flagellar assembly protein FliH
	2630978368	2157141	2157434	flagellar motor switch protein FliN/FliY
	2630978369	2157438	2158175	flagellar biosynthetic protein FliP
	2630978370	2158185	2158802	sugar transferase
	2630978371	2158989	2160116	flagellar P-ring protein precursor FlgI
	2630978372	2160113	2161444	flagellin C-terminal helical region
	2630978373	2161448	2162887	flagellar hook-associated protein 1 FlgK
	2630978374	2162928	2164655	Flagella basal body rod protein
	2630978375	2164741	2165613	chemotaxis protein MotB
	Bacterial chemotaxis
	2630979714	3621182	3621550	two-component system, chemotaxis family, response regulator CheY
	2630979715	3621554	3623758	two-component system, chemotaxis family, sensor kinase CheA
	2630979716	3623733	3624200	purine-binding chemotaxis protein CheW
	2630979717	3624197	3625093	chemotaxis protein methyltransferase CheR
	2630979718	3625109	3625495	response regulator receiver protein
	2630979719	3625495	3625860	hypothetical protein
	2630979720	3625988	3628336	methyl-accepting chemotaxis protein
	2630979721	3628386	3629378	CheB methylesterase
	2630979722	3629375	3629944	chemotaxis protein CheD
	2630978279	2066657	2067025	two-component system, chemotaxis family, response regulator CheY
	2630978280	2067050	2067313	hypothetical protein
	2630978281	2067301	2069613	two-component system, chemotaxis family, sensor kinase CheA
	2630978282	2069606	2070007	two-component system, chemotaxis family, response regulator CheY
	2630978283	2070009	2070878	chemotaxis protein methyltransferase CheR
	2630978284	2070868	2071500	HEAT repeat-containing protein
	2630978285	2071515	2072024	CheB methylesterase
	2630978286	2072069	2072605	Response regulator receiver domain-containing protein
	2630978287	2072635	2074230	purine-binding chemotaxis protein CheW
	2630978288	2074253	2076241	methyl-accepting chemotaxis protein
	Gas vesicle protein
	2630980161	4069808	4072630	methyl-accepting chemotaxis sensory transducer with Pas/Pac sensor
	2630980162	4072630	4073028	CheW-like domain-containing protein
	2630980163	4073025	4074134	Chemotaxis signal transduction protein
	2630980164	4074194	4075156	gas vesicle protein GvpN
	2630980165	4075159	4075383	hypothetical protein
	2630980166	4075415	4075723	Gas vesicle synthesis protein GvpO
	2630980167	4075720	4076046	Gas vesicle protein
	2630980168	4076046	4076621	Molecular chaperone IbpA, HSP20 family
	2630980169	4076618	4077382	Gas vesicle synthesis protein GvpL/GvpF
	2630980170	4077382	4077615	Gas vesicle protein G
	2630980171	4077612	4079096	ATPase family associated with various cellular activities (AAA)
	2630980172	4079126	4079710	ATPase family associated with various cellular activities (AAA)
	2630980173	4079707	4080588	Gas vesicle synthesis protein GvpL/GvpF
	2630980174	4080585	4081301	Gas vesicle synthesis protein GvpL/GvpF
	2630980175	4081294	4081518	Gas vesicle protein
	2630980176	4081515	4082144	Gas vesicle synthesis protein GvpL/GvpF
	2630980177	4082141	4082482	Gas vesicle protein K
	2630980178	4082552	4084126	histidine ammonia-lyase
	2630980179	4084144	4084356	Gas vesicle protein
Seretory pathways	TypeVI secretion system
	2630979660	3552994	3554640	type IV secretion system protein VirD4
	2630979661	3554705	3554848	hypothetical protein
	2630979662	3554875	3555087	hypothetical protein
	2630979663	3555290	3556936	Transposase
	2630979664	3557206	3558156	hypothetical protein
	2630979665	3558947	3559813	hypothetical protein
	2630979666	3560539	3562185	Transposase
	2630979667	3562342	3562779	Type II/IV secretion system protein
	2630979668	3562776	3563108	type IV secretion system protein VirB2
	2630979669	3563108	3563389	type IV secretion system protein VirB3
	2630979670	3563400	3565880	type IV secretion system protein VirB4
	2630979671	3565892	3566680	P-type conjugative transfer protein TrbJ
	2630979672	3566694	3566960	conjugative transfer region protein TrbK
	2630979673	3566964	3568313	type IV secretion system protein TrbL
	2630979674	3568310	3568987	type IV secretion system protein VirB5
	2630979675	3568810	3569745	transposase
	2630979676	3569893	3570153	VirB8 protein
	2630979677	3570150	3571124	type IV secretion system protein VirB9
	2630979678	3571121	3572260	type IV secretion system protein VirB10
	Type VI secretion system
	2630978922	2742508	2743020	conjugative transfer signal peptidase TraF
	2630978923	2743025	2743774	Transglycosylase SLT domain-containing protein
	2630978924	2744022	2745776	Type IV secretory pathway, VirD2 components (relaxase)
	2630978925	2745790	2747784	type IV secretion system protein VirD4
	2630978926	2747794	2748216	Ribbon-helix-helix protein, copG family
	2630978927	2748400	2749335	type IV secretion system protein VirB11
	2630978928	2749332	2749667	type IV secretion system protein VirB2
	2630978929	2749664	2749933	type IV secretion system protein VirB3
	2630978930	2749941	2752436	type IV secretion system protein VirB4
	2630978931	2752414	2753193	P-type conjugative transfer protein TrbJ
	2630978932	2753200	2753478	conjugative transfer region protein TrbK
	2630978933	2753482	2754771	type IV secretion system protein TrbL
	2630978934	2754768	2755454	type IV secretion system protein VirB5
	2630978935	2755451	2756491	type IV secretion system protein VirB9
	2630978936	2756495	2757718	type IV secretion system protein VirB10
	2630979041	2860485	2861756	sulfide-quinone oxidoreductase
	2630979126	2970458	2971477	type VI secretion system protein ImpA
	2630979127	2971535	2972044	type VI secretion system protein ImpB
	2630979128	2972049	2973542	type VI secretion system protein ImpC
	2630979129	2973632	2974117	type VI secretion system secreted protein Hcp
	2630979130	2974222	2975073	type VI secretion system protein ImpE
	2630979131	2975066	2975563	type VI secretion system protein ImpF
	2630979132	2975569	2977446	type VI secretion system protein ImpG
	2630979133	2977410	2978462	type VI secretion system protein ImpH
	2630979134	2978475	2981186	type VI secretion system protein VasG
	2630979135	2981250	2983358	type VI secretion system secreted protein VgrG
	2630979136	2983369	2983974	hypothetical protein
	2630979137	2983978	2984271	PAAR motif-containing protein
	2630979138	2984278	2985693	FHA domain protein
	2630979139	2985697	2987037	type VI secretion system protein ImpJ
	2630979140	2987074	2988468	type VI secretion system protein ImpK
	2630979141	2988468	2992166	type VI secretion system protein ImpL
	2630979142	2992166	2992867	type VI secretion system protein ImpM
	2630979143	2992831	2993577	serine/threonine protein phosphatase Stp1
	2630979144	2993583	2994431	D-alanyl-D-alanine carboxypeptidase
	2630979145	2994447	2994962	Invasion protein IalB, involved in pathogenesis
	2630979146	2995303	3004032	hypothetical protein
	2630979147	3004202	3005818	type VI secretion system protein ImpK
	2630979148	3005823	3009260	type VI secretion system protein ImpL
CRISPR-associated proteins	2630978506	2316955	2317260	CRISPR-associated protein, Cas2 family
	2630978507	2317296	2318207	CRISPR-associated protein, Cas1 family
	2630978508	2318268	2321306	CRISPR-associated endonuclease, Csn1 family
Nitrogen metabolism	Urease
	2630979504	3394028	3394849	urease accessory protein
	2630979505	3394851	3395153	urease subunit gamma
	2630979506	3395165	3395329	hypothetical protein
	2630979507	3395326	3395631	urease subunit beta
	2630979508	3395663	3396247	hypothetical protein
	2630979509	3396260	3396679	Uncharacterized conserved protein YecT, DUF1311 family
	2630979510	3396693	3398402	urease subunit alpha
	2630979511	3398552	3398776	protein of unknown function (DUF1127)
	2630979512	3398954	3399175	hypothetical protein
	2630979513	3399213	3399734	urease accessory protein
	2630979514	3399682	3400368	urease accessory protein
	2630979515	3400365	3400988	urease accessory protein
	Nitrogenase
	2630978104	1912393	1912728	nitrogenase-stabilizing/protective protein
	2630978105	1912725	1913927	homocitrate synthase NifV
	2630978106	1913939	1914643	Modular FeS cluster scaffolding protein NifU
	2630978107	1914654	1914974	Iron-sulfur cluster assembly accessory protein
	2630978108	1915322	1915624	ferredoxin III, nif-specific
	2630978109	1915642	1915851	hypothetical protein
	2630978110	1915886	1916359	probable nitrogen fixation protein
	2630978111	1916356	1916841	nitrogen fixation protein NifX
	2630978112	1916813	1918207	nitrogenase molybdenum-iron protein NifN
	2630978113	1918211	1919689	nitrogenase molybdenum-cofactor synthesis protein NifE
	2630978442	2239795	2241594	Nif-specific regulatory protein
	2630978443	2242004	2243473	nitrogen fixation protein NifB
	2630978444	2243500	2243694	4Fe-4S dicluster domain-containing protein
	2630978445	2243649	2244476	HEAT repeat-containing protein
	2630978446	2244463	2244741	nitrogen fixation protein NifZ
	2630978447	2244738	2244947	nitrogen fixation protein NifT
	2630978448	2244953	2245786	SIR2-like domain-containing protein
	2630978449	2246133	2247014	nitrogenase iron protein NifH
	2630978450	2247084	2248550	Mo-nitrogenase MoFe protein subunit NifD precursor
	2630978451	2248648	2250186	Mo-nitrogenase MoFe protein subunit NifK
	2630978322	2112607	2113026	nitric oxide dioxygenase
	2630978323	2113034	2115481	nitrite reductase (NAD(P)H)
	2630978324	2115478	2115810	nitrite reductase (NADH)
	2630978325	2115810	2118431	assimilatory nitrate reductase (NADH)
Phage like proteins	Mu-like head phage
	2630976897	689037	689264	hypothetical protein
	2630976898	689746	690174	hypothetical protein
	2630976899	690186	690902	Phage repressor protein C, contains Cro/C1-type HTH and peptisase s24 domains
	2630976900	690956	691243	hypothetical protein
	2630976901	691243	691983	hypothetical protein
	2630976902	692115	692351	hypothetical protein
	2630976903	692348	692620	hypothetical protein
	2630976904	692625	692855	Helix-turn-helix domain-containing protein
	2630976905	692848	693072	hypothetical protein
	2630976906	693069	693917	chromosome partitioning protein, ParB family
	2630976907	693914	696055	Mu DNA-binding domain-containing protein
	2630976908	696128	696874	AAA domain-containing protein
	2630976909	696871	697452	hypothetical protein
	2630976910	697449	697829	hypothetical protein
	2630976911	697829	698194	hypothetical protein
	2630976912	698187	698411	hypothetical protein
	2630976913	698408	699073	Protein of unknown function (DUF3164)
	2630976914	699085	699285	hypothetical protein
	2630976915	699424	699879	Protein of unknown function (DUF1018)
	2630976916	699876	700088	hypothetical protein
	2630976917	700085	700327	hypothetical protein
	2630976918	700332	700745	hypothetical protein
	2630976919	700830	701324	N-acetylmuramoyl-L-alanine amidase
	2630976920	701321	701530	hypothetical protein
	2630976921	701532	701942	Protein of unknown function (DUF2730)
	2630976922	701939	702241	hypothetical protein
	2630976923	702247	702783	Protein of unknown function (DUF3486)
	2630976924	702783	702974	hypothetical protein
	2630976925	702974	703156	hypothetical protein
	2630976926	703161	703514	hypothetical protein
	2630976927	703519	703833	hypothetical protein
	2630976928	703830	704066	hypothetical protein
	2630976929	704059	705468	Mu-like prophage FluMu protein gp28
	2630976930	705468	707021	Mu-like prophage protein gp29
	2630976931	707021	708334	phage putative head morphogenesis protein, SPP1 gp7 family
	2630976932	708331	708516	hypothetical protein
	2630976933	708694	709722	Mu-like prophage I protein
	2630976934	709724	710113	hypothetical protein
	2630976935	710125	711021	Mu-like prophage major head subunit gpT
	2630976936	711080	711313	hypothetical protein
	2630976937	711318	711746	Mu-like prophage protein gp36
	2630976938	711748	712254	Mu-like prophage protein gpG
	2630976939	712251	712697	hypothetical protein
	2630976940	712705	713634	hypothetical protein
	2630976941	713647	714039	hypothetical protein
	2630976942	714102	714398	hypothetical protein
	2630976943	714395	716326	hypothetical protein
	2630976944	716327	716683	hypothetical protein
	2630976945	716680	717156	protein of unknown function (DUF1833)
	2630976946	717153	717533	NlpC/P60 family protein
	2630976947	717523	723060	Phage-related protein, tail component
	phage-like proteins
	2630978830	2664290	2664535	hypothetical protein
	2630978831	2664525	2664752	hypothetical protein
	2630978832	2664749	2665582	chromosome partitioning protein, ParB family
	2630978833	2665584	2667899	putative transposase
	2630978834	2667930	2668706	hypothetical protein
	2630978835	2668706	2669302	hypothetical protein
	2630978836	2669287	2669670	hypothetical protein
	2630978837	2669667	2670317	Protein of unknown function (DUF3164)
	2630978838	2670329	2670688	hypothetical protein
	2630978839	2670690	2670935	hypothetical protein
	2630978840	2670932	2671111	hypothetical protein
	2630978841	2671133	2671402	bacterial nucleoid protein HU beta subunit
	2630978842	2671491	2672018	hypothetical protein
	2630978843	2672011	2672196	hypothetical protein
	2630978844	2672193	2672402	hypothetical protein
	2630978845	2672458	2672757	hypothetical protein
	2630978846	2672750	2672965	hypothetical protein
	2630978847	2672962	2673390	Protein of unknown function (DUF1018)
	2630978848	2673390	2674049	hypothetical protein
	2630978849	2674046	2674417	hypothetical protein
	2630978850	2674511	2675236	TIGR02594 family protein
	2630978851	2675247	2675528	hypothetical protein
	2630978852	2675546	2675794	Haemolysin XhlA
	2630978853	2675781	2676290	Protein of unknown function (DUF1804)
	2630978854	2676287	2677948	phage uncharacterized protein (putative large terminase)
	2630978855	2677945	2679330	Mu-like prophage protein gp29
	2630978856	2679342	2680886	Phage Mu protein F like protein
	2630978857	2680988	2681554	phage virion morphogenesis (putative tail completion) protein
	2630978858	2681831	2682940	hypothetical protein
	2630978859	2682953	2683297	hypothetical protein
	2630978860	2683310	2684263	Phage major capsid protein E
	2630978861	2684274	2684546	hypothetical protein
	2630978862	2684546	2684728	hypothetical protein
	2630978863	2684733	2685167	hypothetical protein
	2630978864	2685164	2685583	Mu-like prophage protein gp36
	2630978865	2685583	2686023	hypothetical protein
	2630978866	2686020	2686166	hypothetical protein
	2630978867	2686170	2687096	hypothetical protein
	2630978868	2687158	2687532	hypothetical protein
	2630978869	2687685	2687897	Phage related hypothetical protein (DUF1799)
	2630978870	2687894	2689726	Prophage tail length tape measure protein
	2630978871	2689702	2689884	hypothetical protein
	2630978872	2689881	2690549	hypothetical protein
	2630978873	2690551	2691144	hypothetical protein
	2630978874	2691141	2691554	hypothetical protein
	2630978875	2691554	2695363	Putative phage tail protein
Gene transfer agent	2630976410	194386	195102	Protein of unknown function (DUF2793)
	2630976411	195095	199003	Putative phage tail protein
	2630976412	199007	199450	putative phage cell wall peptidase, NlpC/P60 family
	2630976413	199447	200334	phage conserved hypothetical protein BR0599
	2630976414	200334	200966	TIGR02217 family protein
	2630976415	200980	201645	phage tail tape measure protein, lambda family
	2630976416	201649	201846	phage conserved hypothetical protein
	2630976417	201833	202165	Phage tail tube protein, GTA-gp10
	2630976418	202162	202578	phage major tail protein, TP901-1 family
	2630976419	202600	203010	Protein of unknown function (DUF3168)
	2630976420	203007	203348	head-tail adaptor
	2630976421	203345	203941	phage conserved hypothetical protein, phiE125 gp8 family
	2630976422	204097	205284	phage major capsid protein, HK97 family
	2630976423	205327	205890	hypothetical protein
	2630976424	205909	206166	hypothetical protein
	2630976425	206163	207338	phage portal protein, HK97 family
	2630976426	207459	208871	Large terminase phage packaging protein
